# 1 **Nociceptive stimuli activate the hypothalamus-habenula circuit to inhibit the** 2 **mesolimbic reward system**

3

## 4 **Authors**

5 Soo Min Lee<sup>1,3</sup>, Yu Fan<sup>2,3</sup>, Bonghyo Lee<sup>3</sup>, Sang Chan Kim<sup>4</sup>, Kyle B. Bills<sup>5</sup>, Scott C. Steffensen<sup>6</sup>,  
6 Hee Young Kim<sup>3,\*</sup>

7

## 8 **Affiliations**

9 <sup>1</sup>Emotion, Cognition & Behavior Research Group, Korea Brain Research Institute (KBRI),  
10 Daegu 41062, South Korea

11 <sup>2</sup>Department of Human Anatomy and Histoembryology, Nanjing University of Chinese  
12 Medicine, Nanjing 210023, China

13 <sup>3</sup>Department of Physiology, College of Korean Medicine, Daegu Haany University, Daegu  
14 42158, South Korea

15 <sup>4</sup>Medical Research Center, College of Korean Medicine, Daegu Haany University, Gyeongsan  
16 38610, South Korea

17 <sup>5</sup>Department of Biomedical Sciences, Noorda College of Osteopathic Medicine, Provo, UT  
18 84606, USA

19 <sup>6</sup>Department of Psychology and Neuroscience, Brigham Young University, Provo, UT 84602,  
20 USA

21 \*Corresponding author. Email: [hykim@dhu.ac.kr](mailto:hykim@dhu.ac.kr)

22

## 23 **Abstract**

24 Nociceptive signals interact with various regions of the brain, including those involved in  
25 physical sensation, reward, cognition, and emotion. Emerging evidence points to a role of  
26 nociception in the modulation of the mesolimbic reward system. The mechanism by which  
27 nociception affects dopamine (DA) signaling and reward is unclear. The lateral hypothalamus  
28 (LH) and the lateral habenula (LHb) receive somatosensory inputs and are structurally  
29 connected with the mesolimbic DA system. Here we show that the LH-LHb pathway is  
30 necessary for nociceptive modulation of this system. Our extracellular single-unit recordings  
31 and head-mounted microendoscopic calcium imaging revealed that nociceptive stimulation by  
32 tail-pinch excited LHb and LH neurons, which was inhibited by chemical lesion of the LH.  
33 Tail-pinch decreased extracellular DA release in the nucleus accumbens ventrolateral shell,  
34 which was blocked by disruption of the LH. Furthermore, tail-pinch attenuated cocaine-  
35 induced locomotor activity, 50-kHz ultrasonic vocalizations and reinstatement of cocaine-  
36 seeking behavior, which was inhibited by chemogenetic silencing of the LH-LHb pathway. Our

37 findings suggest that nociceptive stimulation recruits the LH-LHb pathway to inhibit  
38 mesolimbic DA system and drug reinstatement.

39

## 40 **Introduction**

41 Nociceptive stimuli include noxious pressure (e.g., tail-pinch), temperature (<10°C and  
42 >40°C), and chemicals (e.g., acids) [1]. The nociceptive signals are conveyed to the central  
43 nervous system from the periphery via spinal cord circuits and interact with many different  
44 brain areas, including those involved in physical sensation, reward, cognition, and emotion [2].  
45 The mesolimbic dopamine (DA) system, sometimes referred to as the brain reward center, is a  
46 central nervous system circuit in which DA neurons in the ventral tegmental area (VTA) are  
47 connected to brain regions such as the nucleus accumbens (NAc), the prefrontal cortex, and the  
48 amygdala [3]. This system is critically involved in motivation, reward, and addiction [3].  
49 Emerging evidence points to a role of nociception in the modulation of the mesolimbic system.  
50 Peripheral nerve injury, for instance, reduces morphine-induced conditioned place preference  
51 in mice and this effect is associated with DAergic activity in the NAc and the VTA [4]. In  
52 addition, nociceptive stimuli such as electric foot shocks and chemical injection during the self-  
53 administration training period strongly reduce drug-taking behavior such as fentanyl, cocaine,  
54 and methamphetamine in rodents [5-7]. Given the convergence of nociception with mesolimbic  
55 DA system, it is likely that nociception modifies the mesolimbic DAergic activity and  
56 influences drug reinstatement. However, to date, which neural circuit contributes to the  
57 delivery of nociceptive information to the mesolimbic DA system has not been fully known.

58 Nociceptive stimuli may require a series of neural circuits to arrive at the mesolimbic DA  
59 system [8]. The lateral habenula (LHb), an epithalamic structure, has been reported to be  
60 involved in processing information of peripheral sensation and nociceptive events and  
61 modulating motivational and cognitive processes [9]. Once activated, the LHb transmits  
62 glutamatergic projection to the rostromedial tegmental nucleus (RMTg) that projects  
63 GABAergic inputs to the VTA DA neurons, which eventually reduces DA release in the NAc  
64 [10, 11]. Studies have addressed the role of the LHb-RMTg-VTA connections in motivated  
65 behaviors and drug addiction [11-13]. The lateral hypothalamus (LH) has also been reported to  
66 process nociceptive signals [14, 15]. The LH and LHb are directly connected with each other  
67 by glutamatergic inputs arising from the LH [10]. Lazaridis et al. reported that the LH-LHb  
68 pathway encodes negative valence showing that optogenetic activation of the LHb-projecting  
69 LH glutamate neurons induces mice to switch from reward to non-reward in the probabilistic  
70 2-choice switching task [16]. Given these findings, we hypothesized that the LH-LHb pathway  
71 conveys nociceptive signals to the mesolimbic DA system, thereby modulating cocaine-taking  
72 behavior and reinstatement of cocaine-seeking behavior.

73 To demonstrate this, we performed *in vivo* extracellular single-unit recording and calcium  
74 imaging to ascertain the effects of tail-pinch on neural activities of the LH and LHb and then  
75 chemically ablated the LH to examine whether the neural activity of the LHb is influenced by  
76 tail-pinch in the absence of the LH signals. We next recorded DA transients in the NAc

77 ventrolateral shell during application of tail-pinch using *in vivo* fast-scan cyclic voltammetry  
78 (FSCV). We investigated effects of tail-pinch on behavioral changes induced by a single  
79 cocaine injection and cocaine-seeking/taking behaviors in the self-administration paradigm.  
80 Then, we investigated the role of the LH-LHb pathway in the effects of tail-pinch on cocaine-  
81 induced behavioral alterations by chemogenetic inhibition of the LH-LHb pathway.

82

## 83 **Results**

### 84 ***Excitation of the LHb and the LH by Tail-Pinch***

85 To examine whether nociceptive stimulation excites the LH-LHb pathway, neural activities  
86 of the LHb and the LH following tail-pinch were investigated using *in vivo* extracellular single-  
87 unit recording or *in vivo* microendoscopic calcium imaging. Three different stimuli of brush,  
88 light pressure, and tail pinch were sequentially given to the tails for each 10 sec (Fig. 1A-C).  
89 While firing rates of the LHb neurons were not changed by brush and light pressure (8.5 g von  
90 Frey filament), application of tail-pinch evoked firing rates of the LHb neurons up to  $182.25 \pm$   
91  $7.22\%$  compared with the basal activity for 10 sec before tail-pinch (Fig. 1B and 1C;  $n=16$  cells;  
92 one-way repeated ANOVA,  $F_{(2,29)}=79.491$ ).

93 To confirm the excitatory effect of tail-pinch on the LHb neurons, *in vivo* calcium imaging  
94 was performed in the LHb (Fig. 1D-G). The rats with a calcium sensor GCaMP6s in the LHb  
95 were head-mounted with fluorescence microscope and then calcium transients following tail-  
96 pinch were recorded (Fig. 1D). When tail-pinch was applied for 10 sec, the calcium indicator  
97 GCaMP6s showed an initial rise followed by a sustained decrease in response to tail-pinch in  
98 the LHb neurons (Fig. 1E and 1F). The average of  $\Delta F/F_0$  was  $6.28 \pm 1.43\%$  during tail-pinch  
99 while the value before tail-pinch was  $0.76 \pm 0.09\%$  (Fig. 1G;  $n=175$  cells from 6 rats; paired *t*-  
100 test). We repeated this experiment in the LH neurons by using *in vivo* calcium imaging (Fig.  
101 1H-K). The rats were given application of tail-pinch for 10 sec. Immediately after tail-pinch,  
102 fluorescence intensity of the calcium indicator GCaMP6s in the LH neurons markedly  
103 increased and declined steadily (Fig. 1I and 1J). The average of  $\Delta F/F_0$  increased to  $4.97 \pm 0.80\%$   
104 during tail-pinch from  $1.61 \pm 0.21\%$  (Fig. 1K;  $n=153$  cells from 5 rats; paired *t*-test). These data  
105 indicate that nociceptive stimulation excites both the LHb and the LH neurons.

106

### 107 ***The LH Mediation in Activation of the LHb by Tail-Pinch***

108 To identify the mediation of the LH in transduction of nociceptive signals of tail-pinch to  
109 the LHb neurons, we ablated the LH by intracranial injection of neurotoxic ibotenic acid and  
110 measured a neural activity of the LHb following tail-pinch using *in vivo* extracellular single-  
111 unit recording or *in vivo* calcium imaging. Ibotenic acid was injected into the LH 7 days prior  
112 to the examinations (Fig. 2A and 2D). In *in vivo* extracellular single-unit recording, tail-pinch  
113 failed to induce excitation of the LHb neurons in the LH-lesioned rats (Fig. 2B and 2C;  $n=52$   
114 cells; one-way repeated ANOVA,  $F_{(18,2)}=1.697$ ). To perform *in vivo* calcium imaging, the LH-  
115 lesioned rats were injected with the calcium indicator GCaMP6s in the LHb and calcium-

116 induced fluorescence changes following tail-pinch were monitored in the LHb (Fig. 2D). While  
117 tail-pinch induced a consistent increase in the fluorescence in intact rats (Fig. 1D), such  
118 increase was not observed in the LH-lesioned rats (Fig. 2E and 2F). In addition, the averages  
119 of  $\Delta F/F_0$  before (Pre) and during tail-pinch (Tail-pinch) were  $1.86 \pm 0.46\%$  and  $2.37 \pm 0.24\%$ ,  
120 respectively, but there was no significant difference between the two groups (n=121 cells from  
121 4 rats; paired *t*-test). These data suggest that nociceptive signals are conveyed to the LHb via  
122 the LH.

123

#### 124 ***A Reduction of DA Release in the NAc Shell by Tail-Pinch and its Reversal by the LH Lesion***

125 To determine whether nociceptive stimuli have an influence on mesolimbic DA release and  
126 if it was mediated via the LH, effects of tail-pinch on evoked DA release in the NAc  
127 ventrolateral shell were measured using *in vivo* FSCV in intact or the LH-lesioned rats. Ibotenic  
128 acid was injected into the LH a week prior to the experiments and then recordings were  
129 conducted in the ventrolateral part of the NAc shell (Fig. 3A and 3B). DA levels gradually  
130 decreased to  $78.5 \pm 4.85\%$  10 min after application of tail-pinch, but the decreased DA levels  
131 slowly recovered to the level of baseline when tail-pinch was removed (Fig. 3C; n=6 rats; one-  
132 way repeated ANOVA,  $F_{(10,50)}=4.817$ ). When tail-pinch was applied continuously for 30 min,  
133 DA levels steadily decreased to  $63.9 \pm 4.74\%$  at the end of the stimulation compared to the  
134 values before tail-pinch (Fig. 3D and 3E; Tail-pinch group, n=7 rats) or Control (normal rats;  
135 n=6 rats). The sustained decrease of DA release by tail-pinch was not observed in the rats with  
136 chemical lesion of the LH (LH lesion+Tail-pinch group, n=8 rats; two-way repeated ANOVA,  
137  $F_{(28,140)}=3.943$ ). These data suggest the mediation of the LH in nociceptive modulation of the  
138 mesolimbic DA system.

139

#### 140 ***Suppression of Cocaine-Induced Psychomotor Activities by Tail-Pinch and Mediation of the*** 141 ***LH-LHb Pathway***

142 On the basis of our electrophysiological and microendoscopic findings that tail-pinch  
143 activated the LH-LHb pathway and thus suppressed extracellular DA release in the NAc  
144 ventrolateral shell, we further explored the effects of tail-pinch on acute cocaine-enhanced  
145 locomotor activity and emission of 50-kHz USVs, known to be associated with mesolimbic  
146 DA levels [17]. Locomotor activity and 50-kHz USVs were recorded in custom-built chambers  
147 simultaneously (Fig. 4A). Cocaine administration rapidly increased locomotion with a peak at  
148 10 min, followed by a steady decrease over the 60 min (Fig. 4B; Coc. group, n=6 rats). Tail-  
149 pinch significantly inhibited the cocaine-enhanced locomotion (Coc.+Tail-pinch group, n=6  
150 rats), compared to the Coc. group, while tail-pinch itself did not affect locomotor activity in  
151 normal rats (Tail-pinch group, n=6 rats; two-way repeated ANOVA,  $F_{(10,50)}=31.814$ ).  
152 Furthermore, we analyzed the number of 50-kHz USVs, detected during the locomotor activity  
153 (Fig. 4C). Cocaine administration evoked a large number of 50-kHz USVs, compared to the  
154 basal value before cocaine injection, which was strongly reduced by application of tail-pinch  
155 (two-way ANOVA,  $F_{(2,24)}=64.629$ ). These data suggest a reversal of the cocaine-induced

156 psychomotor activities by nociception.

157 To evaluate mediation of the LH-LHb pathway in the inhibitory effects of tail-pinch on the  
158 cocaine-induced psychomotor activities, a retrograde viral vector encoding an inhibitory  
159 DREADD (hM4Di) was injected into the LHb, CNO was intracranially infused into the LH  
160 (LH-LHb:hM4Di/CNO) in order to silence the LH-LHb pathway, and then effects of tail-pinch  
161 on cocaine-induced behaviors were explored (Fig. 4D). As shown in Fig. 4E, cocaine  
162 administration enhanced locomotor activity (Coc. group, n=7 rats), which was suppressed by  
163 tail-pinch in the rats with LH-LHb:hM4Di/VEH (Coc.+Tail-pinch+hM4Di/VEH group, n=8  
164 rats). The inhibitory effects of tail-pinch on the cocaine-induced locomotion were almost  
165 completely blocked by intracranial CNO infusion in the rats with LH-LHb:hM4Di (Coc.+Tail-  
166 pinch+hM4Di/CNO group, n=6 rats; two-way repeated ANOVA,  $F_{(10,50)}=16.004$ ). These  
167 effects were further confirmed by measuring the number of 50-kHz USVs (Fig. 4F). The  
168 increased emission of 50-kHz USVs by cocaine injection was suppressed by tail-pinch  
169 stimulation in the rats with LH-LHb:hM4Di/VEH (Coc.+Tail-pinch+hM4Di/VEH group). In  
170 contrast, in the rats with LH-LHb:hM4Di, intracranial CNO infusion significantly alleviated  
171 the inhibitory effects of tail-pinch on cocaine-induced emission of 50-kHz USVs, compared to  
172 aCSF infusion (two-way ANOVA,  $F_{(2,26)}=207.049$ ). These results indicate that the inhibitory  
173 effects of tail-pinch on the cocaine-induced hyperlocomotion and positive affective states (50-  
174 kHz USVs) are mediated via the LH-LHb pathway.

175

### 176 *Attenuation of Cocaine-Taking/Seeking Behaviors by Tail-Pinch and Mediation of the LH-* 177 *LHb Pathway*

178 To further examine whether tail-pinch could suppress cocaine-taking behavior and  
179 reinstatement of cocaine-seeking behavior, we employed the cocaine self-administration  
180 paradigm (Fig. 5A and 5B). Mediation of the LH-LHb pathway was investigated by using  
181 chemogenetic inhibition (LH-LHb:hM4Di/CNO). Initially, effects of tail-pinch on a natural  
182 reward were investigated using food training (Fig. 5C; one-way ANOVA,  $F_{(3,32)}=1.000$ ).  
183 Application of tail-pinch throughout the test session (3 h; Tail-pinch session) did not affect  
184 consumption of food pellets. During the cocaine self-administration training (Fig. 5D), rats  
185 were trained to intravenous cocaine infusions (0.5 mg/kg/infusion; Coc. group, n=6 rats).  
186 Application of tail-pinch during the cocaine self-administration training inhibited the  
187 establishment of cocaine self-administration (Coc.+Tail-pinch group, n=5 rats; two-way  
188 repeated ANOVA,  $F_{(9,36)}=1.355$ ). As shown in Fig. 5E, after rats were trained for establishing  
189 the cocaine self-administration (Coc. group, n=5 rats; Coc.+Tail-pinch group, n=6 rats;  
190 Coc.+Tail-pinch+hM4Di/VEH group, n=5 rats; Coc.+Tail-pinch+hM4Di/CNO group, n=6  
191 rats), we tested the effects of tail-pinch on cocaine intakes (Test 1; Fig. 5E-G; 5F, one-way  
192 ANOVA,  $F_{(3,18)}=0.00374$ ; 5G, one-way ANOVA,  $F_{(3,18)}=1.275$ ). Next, the rats were trained for  
193 extinguishing the cocaine self-administration and we investigated the effects of tail-pinch on  
194 reinstatement of cocaine-seeking behavior (Test 2; Fig. 5H-J). In the test 1, although tail-pinch  
195 tended to reduce the number of cocaine infusions, there were no statistically significant  
196 differences among the groups in the number of cocaine intakes as well as active/inactive lever

197 responses (Fig. 5E-G). The rats were then subjected to extinction sessions which the cocaine  
198 solution was replaced with saline and the test 2 was conducted (Fig. 5H-J). While a single  
199 priming injection of cocaine (0.5 mg/kg/mL) produced robust active lever responses that  
200 indicate reinstatement of cocaine-seeking behavior (Coc. group; Fig. 5I), tail-pinch suppressed  
201 the cocaine-primed active lever responses (one-way ANOVA,  $F_{(3,17)}=7.190$ ). The inhibitory  
202 effect of tail-pinch on the reinstatement of cocaine-seeking behavior was suppressed by  
203 pretreatment of intracranial CNO infusion in the rats expressing hM4Di in the LH-LHb  
204 pathway. However, tail-pinch did not affect the number of cocaine intakes and inactive lever  
205 responses (Fig. 5H and 5J; 5J, one-way ANOVA,  $F_{(2,14)}=1.130$ ). These data indicate that  
206 nociceptive stimulation attenuated the cocaine-taking/seeking behaviors via the LH-LHb  
207 pathway.

208

### 209 *Elevation of c-Fos Expression by Tail-Pinch and its Reversal by Chemogenetic Silencing of* 210 *the LH-LHb Pathway*

211 Finally, neuronal activities of the LH and the LHb following cocaine, tail-pinch, and/or  
212 either CNO or aCSF were evaluated by immunohistochemistry for c-Fos. Tail-pinch increased  
213 c-Fos expression in the LH and the LHb in cocaine naïve rats (Tail-pinch group) and the  
214 cocaine-injected rats (Coc.+Tail-pinch group), compared to the Control group and the Coc.  
215 group (Fig. 5A, 5B, 5D, and 5E). In the rats with LH-LHb:hM4Di, the increased c-Fos  
216 expression by tail-pinch was significantly inhibited by CNO administration (Coc.+Tail-  
217 pinch+hM4Di/CNO group), but not by aCSF administration (Coc.+Tail-pinch+hM4Di/VEH  
218 group; one-way ANOVA for LHb or LH group is  $F_{(5,25)}=19.763$  and  $F_{(5,31)}=77.686$ ,  
219 respectively). Furthermore, while the ratios of the c-Fos-expressing hM4Di-infected neurons  
220 to all the hM4Di-infected neurons were  $59.44 \pm 1.33\%$  and  $65.04 \pm 2.10\%$  in the LHb and the  
221 LH in the Coc.+Tail-pinch+hM4Di/VEH group, the ratios of that were  $14.16 \pm 1.25\%$  and  
222  $10.66 \pm 0.97\%$  in the LHb and the LH in the Coc.+Tail-pinch+hM4Di/CNO group (Fig. 5C  
223 and 5F), indicating that, compared to aCSF, CNO infusion significantly decreases c-Fos  
224 expression induced by tail-pinch in the hM4Di-infected LH and LHb neurons (unpaired *t*-test).

225

### 226 **Discussion**

227 In the present study, tail-pinch excited LH and LHb neurons, which was blocked by chemical  
228 lesion of the LH. Tail-pinch decreased DA levels in the NAc ventrolateral shell, which was  
229 disrupted by chemical lesion of the LH. In addition, tail-pinch attenuated cocaine-induced  
230 locomotor activity, emission of 50-kHz USVs, development of cocaine-taking behavior, and  
231 reinstatement of cocaine-seeking behavior, which was reversed by chemogenetic silencing of  
232 the LH-LHb pathway. Tail-pinch increased c-Fos expression of the LH and the LHb neurons,  
233 which was inhibited by chemogenetic silencing of the LH-LHb pathway with CNO. These  
234 results suggest that nociceptive stimulation suppresses mesolimbic DA system and cocaine-  
235 reinforcing effects through the LH-LHb pathway.

236 The LH projects glutamatergic inputs to the LHb area, which afferents from the LH directly  
237 connect to the VTA-projecting LHb neurons (LHb→VTA neurons) [10]. Previous reports have  
238 revealed that an anterograde tracer injected into the LH was expressed in the LHb and strongly  
239 overlaid with immunocytochemical localization of vesicular-glutamate transporter 2 (VGluT2)  
240 in the LHb [10]. The anterogradely traced LH axons overlapped with the LHb neurons which  
241 were retrogradely traced by the VTA [10]. Furthermore, whole-brain mapping of neurons  
242 projecting to the LHb revealed that the LH is the most prominent input region to the LHb [18].  
243 In the present study, excitation of the LHb by tail-pinch was blocked by the LH lesion and a  
244 retrograde viral vector encoding hM4Di which was injected into the LHb was found in the LH  
245 area. It suggests that the LHb is directly innervated by the LH and the LH-LHb circuit conveys  
246 nociception.

247 Previous studies revealed that the LH is involved in drug-taking behaviors, reinstatement of  
248 drug-seeking behavior, and drug-induced synaptic plasticity [19, 20]. Blacktop and Sorg (2019)  
249 reported that degradation of LH structures inhibits cocaine cue-induced reinstatement of drug-  
250 seeking behavior in rats [20]. The LHb also plays a critical role in drug-induced craving and  
251 aversion [12]. The LH-LHb pathway encodes negative valence and controls motivational  
252 behaviors [16, 21]. For example, Lecca et al. reported that chemogenetic silencing of the LH-  
253 LHb pathway disrupts escape behaviors against a compartment paired with electric foot shocks  
254 and against the abrupt presentation of shadow mimicking an attack of predators [21]. In our  
255 findings, both LH and LHb neurons were excited by tail-pinch and chemogenetic silencing of  
256 the LH-LHb pathway alleviated inhibitory effects of tail-pinch on cocaine-enhanced locomotor  
257 activity and reinstatement of cocaine-seeking behavior, suggesting that nociceptive stimulation  
258 inhibits cocaine addictive behaviors through activation of the LH-LHb pathway.

259 Previous studies have suggested that the LHb is involved in nociceptive processing [9, 22].  
260 It was reported that the LHb responds to noxious, but not to non-noxious stimuli [23].  
261 Consistent with previous studies, our *in vivo* electrophysiological data showed that firing rates  
262 of the LHb neurons were evoked by noxious tail-pinch, but not by non-noxious stimuli such as  
263 brush and light pressure. We further confirmed excitation of the LHb neurons in response to  
264 tail-pinch by using *in vivo* calcium imaging. The LH has also been reported to be critically  
265 involved in nociceptive processing [14, 15]. In our study, *in vivo* electrophysiological and  
266 calcium imaging data supported that the LH and the LHb neurons are activated by nociception.  
267 Furthermore, the tail-pinch-induced activation of the LHb neurons was completely blocked by  
268 chemical lesion of the LH. It suggests that nociceptive signals of tail-pinch are conveyed to the  
269 LHb via the LH.

270 Cumulative evidence has suggested that the reward system links to external somatosensory  
271 system [24, 25]. Somatosensory stimuli such as noxious stimulation influence the activity of  
272 DAergic neurons in the reward system [24]. Activation of cervical spine mechanoreceptors  
273 modulates firing of VTA GABA neurons and dopamine release [25]. Furthermore, we and  
274 others have shown that somatosensory stimuli reduce drug-induced craving behaviors through  
275 modulating the mesolimbic DA systems in rats [26, 27]. Application of acupuncture, widely  
276 accepted as a form of peripheral sensory stimulation [28], decreases DA release in the NAc by

277 activating GABA interneurons in the VTA and thus suppresses addiction-related behaviors  
278 caused by drugs such as cocaine, morphine, and ethanol [26, 27]. How the somatosensory  
279 stimulation affects mesolimbic DA systems is largely unknown. In the present study, tail-pinch  
280 reduced the NAc DA release, which was ablated by the LH lesion. Tail-pinch also attenuated  
281 cocaine-enhanced locomotor activity and 50-kHz USVs, known to be associated with an  
282 increase of the NAc DA level [29], which was inhibited by chemogenetic silencing of the LH-  
283 LHb pathway. These findings suggest that somatosensory stimulation such as tail-pinch  
284 suppresses mesolimbic DA system via the LH-LHb pathway.

285 Nociceptive stimulation affects the mesolimbic DA system, although there is a controversy  
286 whether the mesolimbic DA release is reduced or increased by nociceptive stimuli. A large  
287 body of studies has reported that nociception decreases mesolimbic DA release [30, 31], while  
288 other studies have shown opposite results, reporting increase of the mesolimbic DA release by  
289 nociceptive stimulation [32, 33]. Interestingly, new insights and attempts were emerged for  
290 subtyping the NAc shell according to neuroanatomical or functional features, reporting that the  
291 subtypes of the NAc would explain the opposing functions of nociceptive stimuli on the  
292 mesolimbic DA release [34, 35]. According to a previous publication, tail-pinch decreased DA  
293 release and the activity of DAergic fibers in the ventrolateral part of the NAc shell [34]. On the  
294 contrary, tail-pinch increases DA release and the activity of DAergic fibers in the ventromedial  
295 part of the NAc shell [34]. de Jong et al. reported that an electric foot shock suppresses the  
296 activity of DAergic fibers in the lateral part of the NAc shell whereas it enhances the activity  
297 in the ventromedial part of the NAc shell [35]. The present study recorded DA efflux in the  
298 ventrolateral part of the NAc shell using the FSCV and found that tail-pinch significantly  
299 decreases the mesolimbic DA release. Thus, we assumed that discrepancy in the NAc DA  
300 release by nociceptive stimulation in previous studies might be due to different DA recording  
301 sites in the NAc.

302 In conclusion, our findings suggest that the LH-LHb pathway plays an important role in  
303 transmitting nociceptive inputs to the mesolimbic DA system and thus inhibiting the cocaine-  
304 taking/seeking behaviors.

305

## 306 **Materials and methods**

### 307 *Animals*

308 All experiments were performed with male Sprague-Dawley rats weighing 250-320 g  
309 (Hyochang, Seoul, Korea). Rats had free access to food and water and were kept under the  
310 room conditions of a 12-hour light-dark cycle, constant temperature ( $24 \pm 1$  °C), and 50%  
311 humidity. All procedures were approved by the Institutional Animal Care and Use Committee  
312 at Daegu Haany University (DHU2018-824) and conducted according to National Institutes of  
313 Health Guide for the Care and Use of Laboratory Animals.

314

### 315 *Chemicals, Reagents, and Antibodies*



316 Cocaine hydrochloride (Macfarlan Smith Ltd, Edinburgh, UK), ibotenic acid (5  $\mu\text{g}/\mu\text{L}$  in  
317 saline; Sigma-Aldrich, St. Louis, MO, USA), AAV-hSyn1-GCaMP6s-P2A-nls-dTomato  
318 (serotype AAV1, viral titer  $\geq 5 \times 10^{12}$  vg/mL; Addgene, Watertown, MA, USA), pAAV-hSyn-  
319 hM4D(Gi)-mCherry (serotype AAV retrograde, viral titer  $\geq 7 \times 10^{12}$  vg/mL; Addgene), and  
320 Clozapine N-oxide (CNO) dihydrochloride (Tocris Bioscience, Bristol, UK) were used. Anti-  
321 c-Fos antibody (ab190289; Abcam Biotechnology, Cambridge, UK), anti-rabbit IgG antibody  
322 (AlexaFluor488, A21206; Thermo Fisher Scientific, Waltham, MA, USA), and Vectashield  
323 antifade mounting medium with DAPI (H-1200; Vector Laboratories, Burlingame, CA, USA)  
324 were used for the immunohistochemistry.

325

### 326 ***Tail-Pinch Stimulation***

327 Tail-pinch stimulation was conducted as described previously with some modifications [36].  
328 Binder clips (19 mm; WHASHIN, Paju, Korea) were used for pinching the tails with a pressing  
329 force of 1.0~1.2 kg. Prior to experiments, the pressing force of the binder clips was further  
330 ensured by using a force sensor (SW-02; CAS, Beijing, China). The stimulation was applied  
331 about 10-20 mm apart from the tips of the tails.

332

### 333 ***Chemical Lesion of the LH***

334 As performed in our previous study [37], ibotenic acid (5  $\mu\text{g}/\mu\text{L}$ ) was injected 7 days prior  
335 to experiments for *in vivo* extracellular single-unit recordings, calcium imaging, and FSCV. In  
336 brief, rats were anesthetized by intraperitoneal injection (i.p.) with pentobarbital sodium (50  
337 mg/kg) and placed in a stereotaxic frame, and two holes were drilled in the skull to access to  
338 the LH (anterior, -2.6 mm; lateral,  $\pm 1.7$  mm; deep, -8.3 mm). Ibotenic acid or saline was  
339 injected into the LH at a rate of 0.25  $\mu\text{L}/\text{min}$  for 2 min by using a 26-gauge Hamilton syringe  
340 (Reno, NV, USA) and a microinjection pump (Pump 22; Harvard Apparatus, Holliston, MA,  
341 USA). The syringe was left in place for at least 5 min to prevent reflux after injection.

342

### 343 ***In vivo Extracellular Single-Unit Recording***

344 Rats were anesthetized by urethane (1.5 g/kg, i.p.) and a carbon-filament glass micro-  
345 electrode (0.4-1.2 M $\Omega$ , Carbostar-1; Kation Scientific, Minneapolis, MN, USA) was  
346 stereotaxically inserted into the LH (anterior, -2.6 mm; lateral,  $\pm 1.7$  mm; deep, -8.3 mm) or the  
347 LHb (anterior, -3.5 mm; lateral,  $\pm 0.7$  mm; deep, -4.9 mm). Single-unit activity was amplified  
348 and filtered at 0.1-10 kHz (ISO-80; World Precision Instruments, Sarasota, FL, USA) and then  
349 noise was binned from the valid single-unit activity at intervals of 1 sec. The single-unit  
350 activities were recorded and analyzed using a CED 1401 Micro3 device and Spike2 software  
351 (Cambridge Electronic Design, Cambridge, UK). After recording a stable baseline for at least  
352 10 min, the rats were given brush, light pressure, or tail-pinch for each 10 sec and recorded for  
353 a further 10 min.

354

### 355 ***In vivo Microendoscopic Calcium Imaging***

356 A calcium sensor GCaMP6s (AAV-hSyn1-GCaMP6s-P2A-nls-dTomato) was injected at a  
357 rate of 0.25  $\mu\text{L}/\text{min}$  for 2 min (0.5  $\mu\text{L}$  per side) into the left or the right side of the LH (anterior,  
358 -2.6 mm; lateral,  $\pm 1.7$  mm; deep, -8.3 mm) or the LHb (anterior, -3.5 mm; lateral,  $\pm 0.7$  mm;  
359 deep, -4.9 mm) in the rats anesthetized with pentobarbital sodium. An imaging cannula with a  
360 500  $\mu\text{m}$  diameter gradient index (GRIN) lens (Doric Lenses, Quebec, Canada) was then placed  
361 into the LH or the LHb and anchored to the skull using dental cement and stainless steel screws.  
362 Four to 6 weeks after the surgery, the rats were connected to the microscope body via the  
363 imaging cannulas implanted on the heads and then calcium imaging process was conducted.  
364 The fluorescent calcium transients were recorded and processed via Doric Neuroscience Studio  
365 software (10 frames per second, and  $20 \pm 5\%$  of illumination power, v.5.2.2.3; Doric lenses).  
366 After recording basal calcium activity for 10 sec, the rats were given tail-pinch for 10 sec and  
367 recordings were continued for a further 10 sec. The background fluorescence was eliminated  
368 from the motion-corrected images. Regions of interests (ROIs) were determined using the  
369 algorithm, principal component analysis (PCA)/independent component analysis (ICA) that  
370 extracted the distinctive cellular signals from imaging data sets. Finally, the relative  
371 fluorescence change ( $\Delta F/F_0$ ) of each ROIs was calculated with  $F_0$  (baseline fluorescence)  
372 corresponding to the temporal average of fluorescence intensity ( $\Delta F$ ).

373

### 374 ***In vivo Fast-Scan Cyclic Voltammetry (FSCV) for Monitoring DA Release***

375 Electrically evoked-DA release in the NAc ventrolateral shell was measured by *in vivo* FSCV,  
376 as performed in our previous study [38]. A custom-made carbon fiber electrode (CFE; 7  $\mu\text{m}$   
377 diameter, 200  $\mu\text{m}$  length of exposed tip) was used. The electrode potential was scanned with a  
378 triangular waveform from -0.4 to +1.3 V and back to -0.4 V versus Ag/AgCl at a scan rate of  
379 400 V per sec. Cyclic voltammograms were recorded every 100 msec by ChemClamp voltage  
380 clamp amplifier (Dagan Corporation, Minneapolis, MN, USA). Recording and analyzing were  
381 performed using a LabVIEW-based (National Instruments, Austin, TX, USA) customized  
382 Demon voltammetry software. Under urethane anesthesia (1.5 g/kg, i.p.), bipolar stainless steel  
383 electrode and CFE were stereotaxically placed into the medial forebrain bundle (MFB; anterior,  
384 -2.5 mm; lateral,  $\pm 1.9$  mm; deep, -8.0~-8.5 mm) and the NAc ventrolateral shell (anterior, +1.6  
385 mm; lateral,  $\pm 1.9$  mm; deep, -8.0~-8.5 mm). The MFB was stimulated with 60 monophasic  
386 pulses at 60 Hz (4 msec pulse width) every 2 min. After a stable baseline was established (less  
387 than 10% variability in peak heights of 5 consecutive collections), the changes of DA release  
388 in the NAc ventrolateral shell following tail-pinch were monitored for a further 30 min. To  
389 identify the recording sites, the rats were sacrificed at the end of the experiments and perfused  
390 with 4% formaldehyde. The brains were taken out, stored in 30% sucrose solution and cryo-  
391 sectioned coronally at a thickness of 30  $\mu\text{m}$ . The slices were stained with toluidine blue and  
392 observed under a light microscope (Microscopessmall, Guangxi, China).

393

## 394 ***Chemogenetics and Cannula Implantation***

395 Under pentobarbital anesthesia (50 mg/kg, i.p.), a retrograde viral vector encoding an  
396 inhibitory designer receptors exclusively activated by designer drugs (DREADD), hM4Di, was  
397 bilaterally injected at a rate of 0.25  $\mu$ L/min for 2 min (0.5  $\mu$ L per side) into the LHb by using a  
398 26-gauge Hamilton syringe mounted on a microinjection pump. Four weeks after the viral  
399 injection, guide cannulas (26-gauge; Plastics One, Roanoke, VA, USA) were implanted  
400 bilaterally into the LH (anterior, -2.6 mm; lateral,  $\pm$ 1.7 mm; deep, -7.3 mm) to locally infuse  
401 the DREADD agonist, CNO or artificial cerebrospinal fluid (aCSF). A week after the surgery,  
402 experiments for locomotor activity and 50-kHz ultrasonic vocalizations (USVs) were  
403 conducted. Internal cannulas (33-gauge; Plastics One) which were protruded beyond the length  
404 of guide cannulas by 1 mm were inserted into the guide cannulas implanted on the heads. CNO  
405 was dissolved in aCSF to 1 mM, as previously described [39]. CNO or vehicle (aCSF) was  
406 intracranially infused at a rate of 0.15  $\mu$ L/min for 2 min through the internal cannulas connected  
407 to a 26-gauge Hamilton syringe and a microinjection pump by polyethylene tubing and an  
408 additional 1 min was allowed for further diffusion.

409

## 410 ***Measurement of 50-kHz USVs and Locomotor Activity***

411 50-kHz USVs and locomotor activity were recorded simultaneously in customized sound-  
412 attenuating chambers. The chamber consisted of two boxes to minimize exterior noise (inside  
413 box: 60 $\times$ 42 $\times$ 42 cm, outside box: 68 $\times$ 50 $\times$ 51 cm). A condenser ultrasonic microphone (Ultramic  
414 250K; Dodotronic, Castel Gandolfo, Italy) and a digital camera were positioned at the center  
415 of the ceiling of the chamber. As performed in our laboratory [29], 50-kHz USVs were recorded  
416 using the ultrasonic microphone with UltraSoundGate 416H data acquisition device (Avisoft  
417 Bioacoustics, Glienicke, Germany). Ultrasonic vocal signals were band-filtered between 30-  
418 and 80-kHz for the 50-kHz USVs and analyzed using Avisoft-SASLab Pro (version 4.2; Avisoft  
419 Bioacoustics). Locomotor activity was measured with a video-tracking system (Ethovision XT;  
420 Noldus Information Technology BV, Wageningen, Netherlands). Rats were habituated for 30  
421 min in the chambers. After recording basal USVs and basal activity for 30 min, the rats received  
422 cocaine (15 mg/kg in saline, i.p.), tail-pinch, and/or either CNO (1 mM) or aCSF through the  
423 implanted guide cannulas. The recordings were continued for a further 60 min.

424

## 425 ***Cocaine Self-Administration, Extinction, and Reinstatement Procedures***

426 Food training and cocaine self-administration were performed in operant chambers equipped  
427 with the active and inactive levers (Med Associates, St. Albans, VT, USA) as described  
428 previously with slight modifications [40]. Initially, rats were food-restricted with 16 g of lab  
429 chow per day and trained to press the active lever to gain 45 mg food pellets (Bio-Serve,  
430 Frenchtown, NJ, USA). Rats that achieved criterion for food responding (100 food pellets for  
431 three consecutive days) were chosen for the cocaine self-administration procedure and  
432 surgically implanted with chronically indwelling intravenous catheters under pentobarbital

433 anesthesia. After recovery of at least 7 days, the rats were trained to self-administer cocaine  
434 intravenously by pressing the active lever under a fixed-ratio schedule (FR 1) in a daily 2-h  
435 session. Once the active lever was pressed, a 0.5 mg/kg/0.1 mL cocaine was infused over 5 sec.  
436 When the intravenous cocaine infusion was initiated, the house light was extinguished for 20  
437 sec and a cue light located above the active lever was illuminated for 5 sec, concomitant with  
438 a 15-sec time-out period. During the time-out period, the active lever responses were recorded  
439 in an automated counting program (Schedule Manager; Med Associates), but no cocaine  
440 infusion was made. Pressing the inactive lever produced no scheduled responses but signals  
441 were recorded in the program (Schedule Manager; Med Associates). After 10 sessions of the  
442 cocaine self-administration training, the rats underwent 7 sessions of the extinction task during  
443 which saline was delivered to the rats without an illumination of the cue light when they had  
444 pressed the active lever. After the extinction task, the rats received a single priming intravenous  
445 injection of 0.5 mg/kg cocaine and the experiment was performed with the same experimental  
446 conditions of the extinction task.

447

#### 448 ***Immunohistochemistry***

449 The immunohistochemistry for c-Fos was carried out as described previously [41]. Forty  
450 min after tail-pinch, cocaine injection, and/or either CNO or aCSF infusion, the rats were  
451 perfused with 4% formaldehyde. The brains were taken out, post-fixed, cryo-protected and  
452 cryo-sectioned into 30  $\mu$ m-thick. The brain slices were incubated with anti-c-Fos rabbit  
453 polyclonal antibodies (1:500), followed by donkey anti-rabbit IgG antibodies (Alexa Fluor 488,  
454 1:500). The slices were then mounted on gelatin-coated slides, photographed and examined  
455 under a confocal laser scanning microscope (LSM700; Carl Zeiss, Oberkochen, Germany). The  
456 number of c-Fos positive cells in the LHb or the LH was blindly counted and 5-7 slices per  
457 animal were analyzed.

458

#### 459 ***Statistical Analysis***

460 Data were presented as the mean  $\pm$  standard error of the mean (SEM) and analyzed by one-  
461 or two-way measurement analysis of variance (ANOVA), one- or two-way repeated ANOVA,  
462 followed by post hoc testing using the Tukey method, unpaired *t*-test or paired *t*-test, where  
463 appropriate. Values of  $p < 0.05$  were regarded as statistically significant.

464

#### 465 ***Acknowledgements***

466 HYK conceived and designed research. SML and YF performed the research. SML, YF and  
467 HYK analyzed the data and drafted the manuscript. HYK was responsible for the overall  
468 direction of the project and for the editing of the manuscript. SCS and KBB provided feedback  
469 on the project. All authors read and approved the final manuscript. This research was supported  
470 by the National Research Foundation of Korea (NRF) grant funded by the Korea government

471 (MSIT) (No. 2018R1A5A2025272, 2019R1A2C1002555, and 2019R1A6A3A13090969) and  
472 the Korea Institute of Oriental Medicine (KIOM) (KSN1812181, KSN2013210).

473

#### 474 **Competing interests**

475 The authors declare that the research was conducted in the absence of any commercial or  
476 financial relationships that could be construed as potential conflicts of interest.

477

#### 478 **References**

- 479 1. Sneddon, L.U., *Comparative Physiology of Nociception and Pain*. Physiology  
480 (Bethesda), 2018. **33**(1): p. 63-73.
- 481 2. Bushnell, M.C., M. Ceko, and L.A. Low, *Cognitive and emotional control of pain and*  
482 *its disruption in chronic pain*. Nat Rev Neurosci, 2013. **14**(7): p. 502-11.
- 483 3. Settell, M.L., et al., *Functional Circuitry Effect of Ventral Tegmental Area Deep Brain*  
484 *Stimulation: Imaging and Neurochemical Evidence of Mesocortical and Mesolimbic*  
485 *Pathway Modulation*. Front Neurosci, 2017. **11**: p. 104.
- 486 4. Narita, M., et al., *Change in the expression of c-fos in the rat brain following sciatic*  
487 *nerve ligation*. Neurosci Lett, 2003. **352**(3): p. 231-3.
- 488 5. Pelloux, Y., B.J. Everitt, and A. Dickinson, *Compulsive drug seeking by rats under*  
489 *punishment: effects of drug taking history*. Psychopharmacology (Berl), 2007. **194**(1):  
490 p. 127-37.
- 491 6. Hu, Y., et al., *Compulsive drug use is associated with imbalance of orbitofrontal- and*  
492 *prelimbic-striatal circuits in punishment-resistant individuals*. Proc Natl Acad Sci U S  
493 A, 2019. **116**(18): p. 9066-9071.
- 494 7. Wade, C.L., et al., *Effect of chronic pain on fentanyl self-administration in mice*. PLoS  
495 One, 2013. **8**(11): p. e79239.
- 496 8. Yam, M.F. and Y.C. Loh, *General Pathways of Pain Sensation and the Major*  
497 *Neurotransmitters Involved in Pain Regulation*. 2018. **19**(8).
- 498 9. Hu, H., Y. Cui, and Y. Yang, *Circuits and functions of the lateral habenula in health*  
499 *and in disease*. Nat Rev Neurosci, 2020. **21**(5): p. 277-295.
- 500 10. Poller, W.C., et al., *A glutamatergic projection from the lateral hypothalamus targets*  
501 *VTA-projecting neurons in the lateral habenula of the rat*. Brain Res, 2013. **1507**: p.  
502 45-60.
- 503 11. Baker, P.M., et al., *The Lateral Habenula Circuitry: Reward Processing and Cognitive*  
504 *Control*. J Neurosci, 2016. **36**(45): p. 11482-11488.

- 505 12. Velasquez, K.M., D.L. Molfese, and R. Salas, *The role of the habenula in drug*  
506 *addiction*. Front Hum Neurosci, 2014. **8**: p. 174.
- 507 13. Zhao, Y.N., et al., *The Rostromedial Tegmental Nucleus: Anatomical Studies and Roles*  
508 *in Sleep and Substance Addictions in Rats and Mice*. Nat Sci Sleep, 2020. **12**: p. 1215-  
509 1223.
- 510 14. Siemian, J.N., et al., *Lateral hypothalamic fast-spiking parvalbumin neurons modulate*  
511 *nociception through connections in the periaqueductal gray area*. Sci Rep, 2019. **9**(1):  
512 p. 12026.
- 513 15. Dafny, N., et al., *Lateral hypothalamus: site involved in pain modulation*. Neuroscience,  
514 1996. **70**(2): p. 449-60.
- 515 16. Lazaridis, I., et al., *A hypothalamus-habenula circuit controls aversion*. Mol Psychiatry,  
516 2019. **24**(9): p. 1351-1368.
- 517 17. Sanchez, W.N., et al., *Diazepam attenuates the effects of cocaine on locomotion, 50-*  
518 *kHz ultrasonic vocalizations and phasic dopamine in the nucleus accumbens of rats*. Br  
519 J Pharmacol, 2021.
- 520 18. Lazaridis, I., et al., *A hypothalamus-habenula circuit controls aversion*. 2019. **24**(9): p.  
521 1351-1368.
- 522 19. Aston-Jones, G., et al., *Lateral hypothalamic orexin/hypocretin neurons: A role in*  
523 *reward-seeking and addiction*. Brain Res, 2010. **1314**: p. 74-90.
- 524 20. Blacktop, J.M. and B.A. Sorg, *Perineuronal nets in the lateral hypothalamus area*  
525 *regulate cue-induced reinstatement of cocaine-seeking behavior*.  
526 Neuropsychopharmacology, 2019. **44**(5): p. 850-858.
- 527 21. Lecca, S., et al., *Aversive stimuli drive hypothalamus-to-habenula excitation to promote*  
528 *escape behavior*. Elife, 2017. **6**.
- 529 22. Gao, D.M., D. Hoffman, and A.L. Benabid, *Simultaneous recording of spontaneous*  
530 *activities and nociceptive responses from neurons in the pars compacta of substantia*  
531 *nigra and in the lateral habenula*. Eur J Neurosci, 1996. **8**(7): p. 1474-8.
- 532 23. Benabid, A.L. and L. Jeaugey, *Cells of the rat lateral habenula respond to high-*  
533 *threshold somatosensory inputs*. Neurosci Lett, 1989. **96**(3): p. 289-94.
- 534 24. Brischoux, F., et al., *Phasic excitation of dopamine neurons in ventral VTA by noxious*  
535 *stimuli*. Proc Natl Acad Sci U S A, 2009. **106**(12): p. 4894-9.
- 536 25. Bills, K.B., et al., *Mechanical stimulation of cervical vertebrae modulates the discharge*  
537 *activity of ventral tegmental area neurons and dopamine release in the nucleus*  
538 *accumbens*. Brain Stimul, 2020. **13**(2): p. 403-411.
- 539 26. Chang, S. and D.H. Kim, *Acupuncture attenuates alcohol dependence through*  
540 *activation of endorphinergic input to the nucleus accumbens from the arcuate nucleus*.

- 541 2019. **5**(9): p. eaax1342.
- 542 27. Yang, C.H., et al., *Acupuncture inhibits GABA neuron activity in the ventral tegmental*  
543 *area and reduces ethanol self-administration*. *Alcohol Clin Exp Res*, 2010. **34**(12): p.  
544 2137-46.
- 545 28. Andersson, S. and T. Lundeberg, *Acupuncture--from empiricism to science: functional*  
546 *background to acupuncture effects in pain and disease*. *Med Hypotheses*, 1995. **45**(3):  
547 p. 271-81.
- 548 29. Kim, M.S., et al., *Role of the central amygdala in acupuncture inhibition of*  
549 *methamphetamine-induced behaviors in rats*. *Addict Biol*, 2021. **26**(1): p. e12862.
- 550 30. Di Chiara, G., P. Loddo, and G. Tanda, *Reciprocal changes in prefrontal and limbic*  
551 *dopamine responsiveness to aversive and rewarding stimuli after chronic mild stress:*  
552 *implications for the psychobiology of depression*. *Biol Psychiatry*, 1999. **46**(12): p.  
553 1624-33.
- 554 31. Ungless, M.A., P.J. Magill, and J.P. Bolam, *Uniform inhibition of dopamine neurons in*  
555 *the ventral tegmental area by aversive stimuli*. *Science*, 2004. **303**(5666): p. 2040-2.
- 556 32. Budygin, E.A., et al., *Aversive stimulus differentially triggers subsecond dopamine*  
557 *release in reward regions*. *Neuroscience*, 2012. **201**: p. 331-7.
- 558 33. Abercrombie, E.D., et al., *Differential effect of stress on in vivo dopamine release in*  
559 *striatum, nucleus accumbens, and medial frontal cortex*. *J Neurochem*, 1989. **52**(5): p.  
560 1655-8.
- 561 34. Yuan, L., Y.N. Dou, and Y.G. Sun, *Topography of Reward and Aversion Encoding in*  
562 *the Mesolimbic Dopaminergic System*. *J Neurosci*, 2019. **39**(33): p. 6472-6481.
- 563 35. de Jong, J.W., et al., *A Neural Circuit Mechanism for Encoding Aversive Stimuli in the*  
564 *Mesolimbic Dopamine System*. *Neuron*, 2019. **101**(1): p. 133-151.e7.
- 565 36. Goebel-Stengel, M., et al., *Orexigenic response to tail pinch: role of brain NPY(1) and*  
566 *corticotropin releasing factor receptors*. *Am J Physiol Regul Integr Comp Physiol*,  
567 2014. **306**(3): p. R164-74.
- 568 37. Chang, S., et al., *Spinal pathways involved in somatosensory inhibition of the*  
569 *psychomotor actions of cocaine*. *Sci Rep*, 2017. **7**(1): p. 5359.
- 570 38. Jang, E.Y., et al., *Involvement of reactive oxygen species in cocaine-taking behaviors*  
571 *in rats*. *Addict Biol*, 2015. **20**(4): p. 663-75.
- 572 39. Mahler, S.V., et al., *Designer receptors show role for ventral pallidum input to ventral*  
573 *tegmental area in cocaine seeking*. 2014. **17**(4): p. 577-85.
- 574 40. Chang, S., et al., *Unpleasant Sound Elicits Negative Emotion and Reinstates Drug*  
575 *Seeking*. *Mol Neurobiol*, 2019. **56**(11): p. 7594-7607.

- 576 41. Jin, W., et al., *Acupuncture reduces relapse to cocaine-seeking behavior via activation*  
577 *of GABA neurons in the ventral tegmental area*. *Addict Biol*, 2018. **23**(1): p. 165-181.  
578



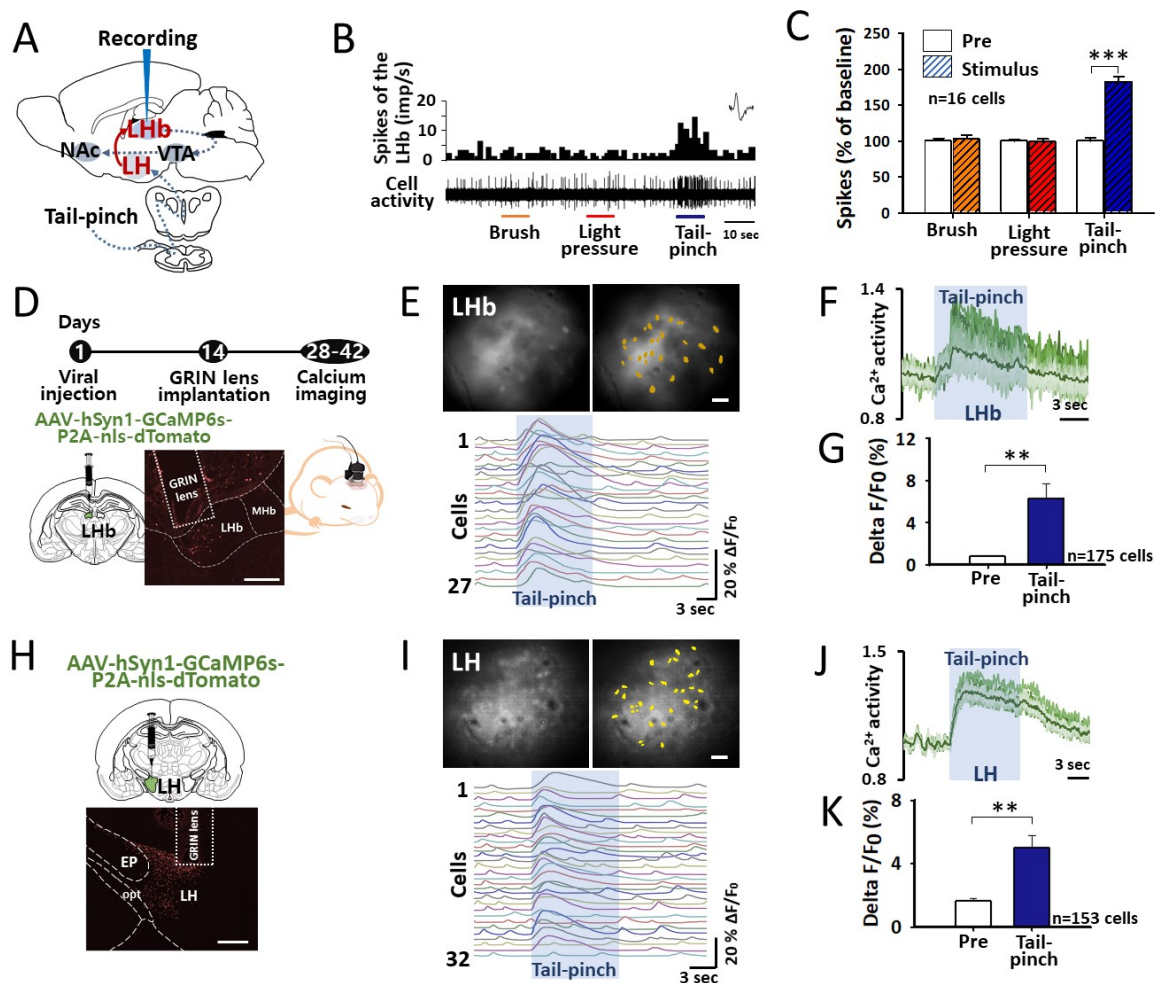

579

580 **Figure 1. Effects of tail-pinch on the neural activities of the LHB and the LH.**

581 (A) A schematic diagram of *in vivo* extracellular single-unit recording in the LHB. (B, C)  
 582 Neural activities of the LHB in responses to brush, light pressure, and tail-pinch for each 10 s.  
 583 n=16 cells. \*\*\*p<0.001, Pre vs. Tail-pinch. (D-G) *in vivo* calcium imaging in the LHB  
 584 following tail-pinch. GCaMP6s expression in the LHB and representative images of the GRIN  
 585 lens track in the LHB (scale bar=400  $\mu$ m). An illustration of a rat with fluorescence microscope  
 586 (D). A representative field of view in the LHB with ROIs (n=27 cells; scale bar=40  $\mu$ m; top)  
 587 and  $\Delta F/F_0$  traces from the ROIs in the LHB (bottom; E). Normalized calcium transients of the  
 588 ROIs in the LHB neurons (F). A bar graph of the averages of  $\Delta F/F_0$  before and during tail-pinch  
 589 for each 10 s in the LHB (n=6 rats; G; \*\*p<0.005, Pre vs. Tail-pinch). (H-K) *in vivo* calcium  
 590 imaging in the LH following tail-pinch. GCaMP6s expression in the LH (scale bar=400  $\mu$ m;  
 591 H) A representative field of view in the LH with ROIs (n=32 cells; scale bar=40  $\mu$ m; top) and  
 592  $\Delta F/F_0$  traces from the ROIs in the LH (bottom; I). Normalized calcium transients of the ROIs  
 593 in the LH neurons (J). A bar graph of the averages of  $\Delta F/F_0$  before and during tail-pinch  
 594 for each 10 s in the LH (n=5 rats; K; \*\*p<0.009, Pre vs. Tail-pinch).

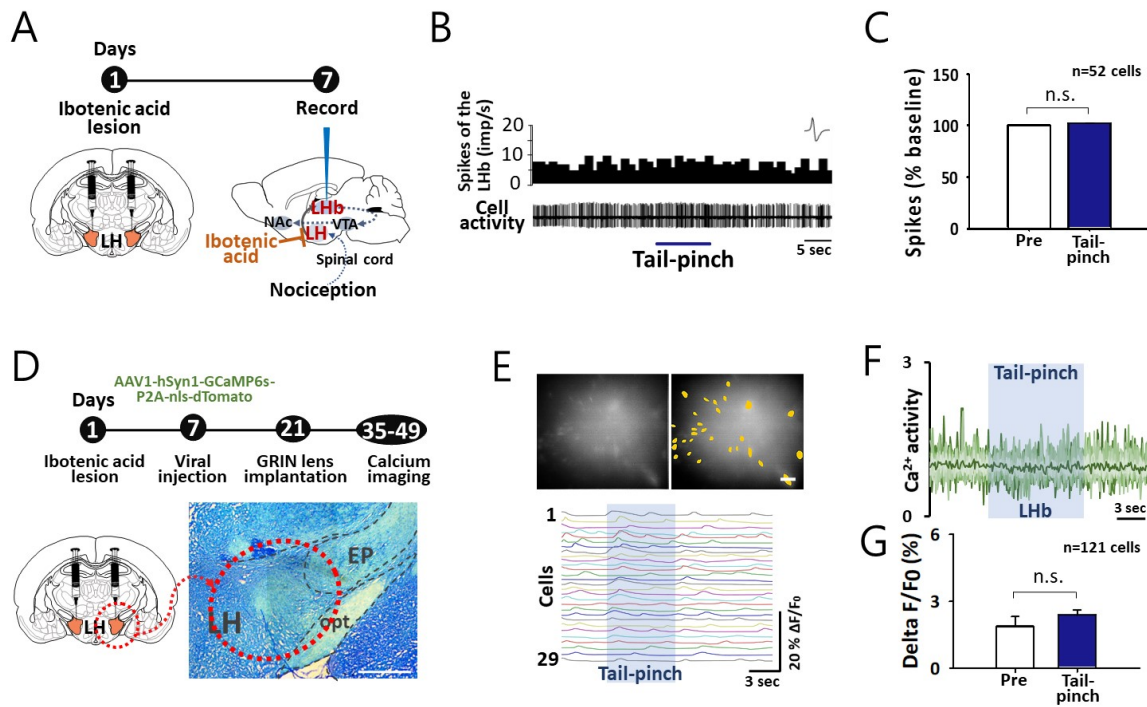

595

596 **Figure 2. Effect of the LH lesion on the neuronal activity of the LHb following tail-pinch**

597 **(A)** A timeline and diagrams of chemical lesion of the LH and *in vivo* extracellular single-unit  
 598 recording in the LHb. **(B-C)** Neural activities of the LHb following tail-pinch in the rats with  
 599 chemical lesion of the LH. n=52 cells. p=0.211. **(D)** A timeline of *in vivo* calcium imaging for  
 600 neural activities of the LHb following tail-pinch in the rats with chemical lesion of the LH. A  
 601 diagram and a representative image of chemical lesion of the LH (scale bar=400  $\mu$ m). A  
 602 diagram of GCaMP6s expression in the LHb. **(E-G)** A representative field of view in the LHb  
 603 with ROIs (n=29 cells; scale bar=40  $\mu$ m; top) and  $\Delta F/F_0$  traces from the ROIs in the LHb  
 604 (bottom; E). Normalized calcium transients of the ROIs in the LHb neurons (F). A bar graph  
 605 of the averages of  $\Delta F/F_0$  before and during tail-pinch for each 10 s in the LHb (n=4 rats; G).  
 606 p=0.329.

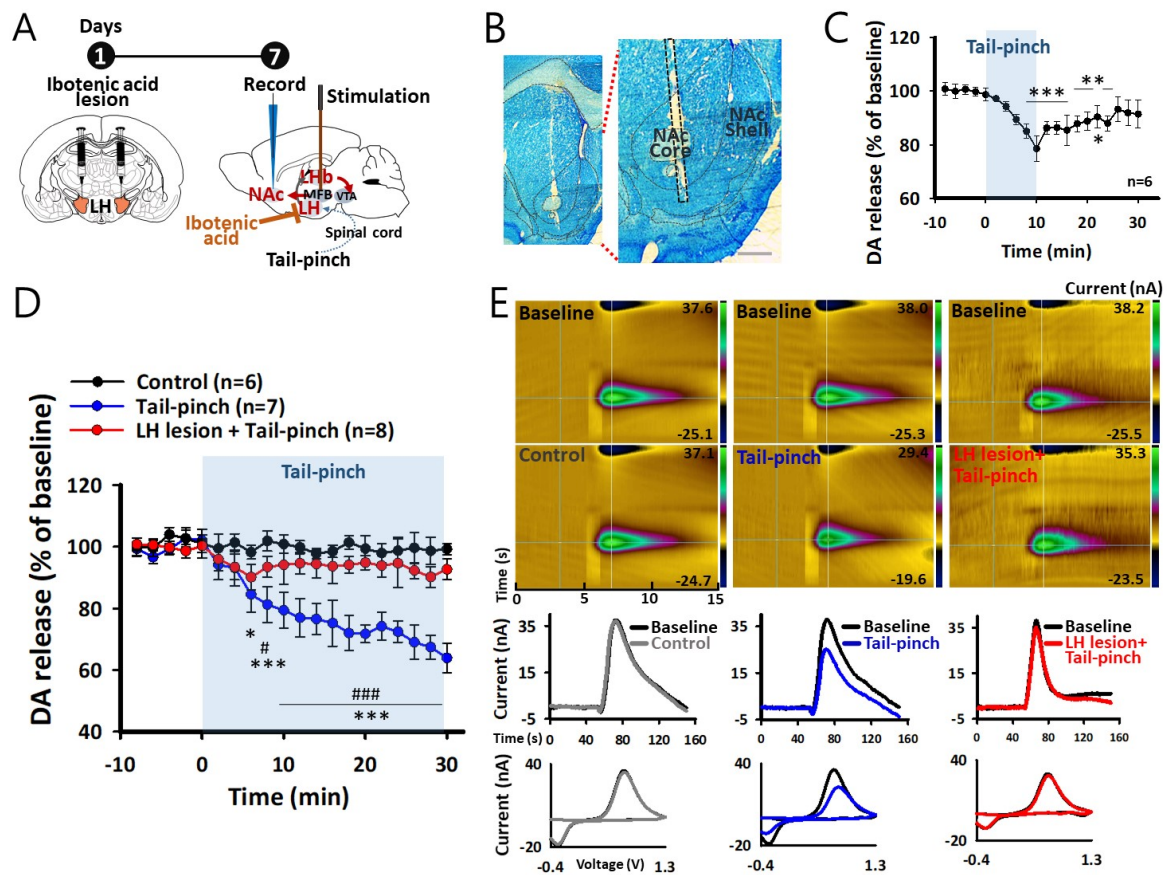

607

608 **Figure 3. Effect of the LH lesion on the mesolimbic DA release following tail-pinch**

609 (A) Schematics for *in vivo* FSCV in the rats with ibotenic acid lesion of the LH. Diagrams of  
 610 ibotenic acid lesion of the LH and electrically evoked DA release in the NAc by stimulating  
 611 the MFB. (B) Representative images of the recording site. A black dashed line indicates the  
 612 track of a CFE. Bar=400  $\mu$ m. (C) Effect of tail-pinch for 10 min on the NAc DA release in  
 613 naïve rats. n=6 rats. \*\*\*p<0.001, \*\*p=0.002, 0.002, and 0.005, \*p=0.03, before tail-pinch vs.  
 614 after tail-pinch. (D) Comparison of the NAc DA release among control group (n=6 rats), Tail-  
 615 pinch group (n=7 rats), and LH lesion+Tail-pinch group (n=8 rats). \*p=0.012, \*\*\*p<0.001,  
 616 Tail-pinch vs. Control; #p=0.016, ###p<0.001, Tail-pinch vs. LH lesion+Tail-pinch. (E)  
 617 Representative pseudo-color plots with color bars indicating the current. Time-series plots  
 618 indicate the current vs. time traces for DA release in each group. Each cyclic voltammogram  
 619 corresponds to the above pseudo-color plots.

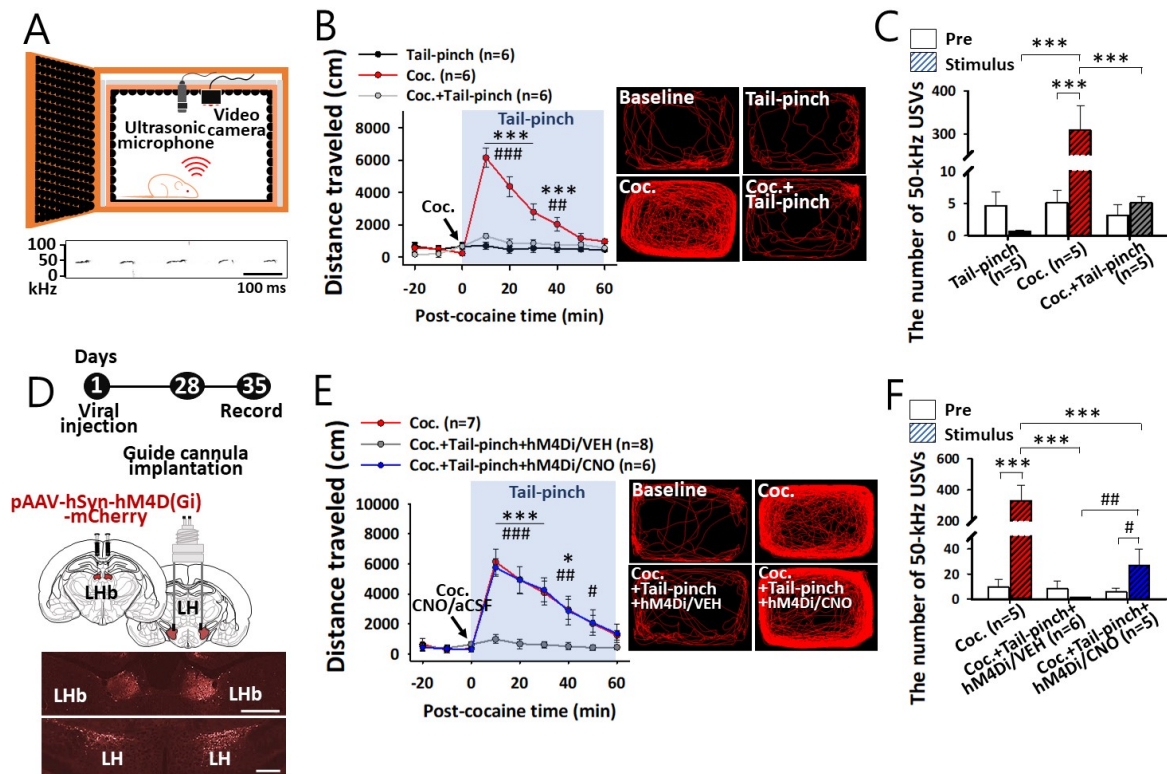

620

621 **Figure 4. Effect of chemogenetic silencing of an LH-LHb pathway on tail-pinch inhibition**  
 622 **of cocaine-induced locomotion and emission of 50-kHz USVs**

623 (A) Illustration of a freely moving rat in a customized USV chamber (top) and a representative  
 624 spectrogram of 50-kHz USVs (bottom). (B, C) Effect of tail-pinch on cocaine-enhanced  
 625 locomotion and 50-kHz USVs in rats. Effect of tail-pinch on cocaine-induced locomotion in  
 626 rats (left of B; \*\*\* $p < 0.001$ , Coc. vs. Tail-pinch; ### $p = 0.005$ , #### $p < 0.001$ , Coc. vs. Coc.+Tail-  
 627 pinch;  $n = 6$ /group). Representative locomotion tracks for 30 min after tail-pinch and/or cocaine  
 628 injection (right of B). Average of 50-kHz USVs for 30 min before and after tail-pinch and/or  
 629 cocaine injection (C; \*\*\* $p < 0.001$ , Coc. vs. Pre, Tail-pinch, and Coc.+Tail-pinch; Tail-pinch,  
 630  $n = 5$ ; Coc.,  $n = 5$ ; Coc.+Tail-pinch,  $n = 5$ ). Tail-pinch, tail-pinch in naïve rats; Coc., cocaine  
 631 injection only; Coc.+Tail-pinch, tail-pinch in cocaine-treated rats. (D) A timeline and diagrams  
 632 of hM4Di injection in the LHb and guide cannula implantation in the LH. Representative  
 633 images of hM4Di expression in the LHb and the LH. Bar=400  $\mu\text{m}$ . (E, F) Effect of  
 634 chemogenetic silencing of the LH-LHb pathway on tail-pinch inhibition of cocaine-induced  
 635 locomotion and emission of 50-kHz USVs. Effect of chemogenetic silencing of the LH-LHb  
 636 pathway on tail-pinch inhibition of cocaine-induced locomotion (left of E; \* $p = 0.011$ ,  
 637 \*\*\* $p < 0.001$ , Coc.+Tail-pinch+hM4Di/VEH vs. Coc.; # $p = 0.039$ , ## $p = 0.005$ , #### $p < 0.001$ ,  
 638 Coc.+Tail-pinch+hM4Di/VEH vs. Coc.+Tail-pinch+hM4Di/CNO; Coc.,  $n = 7$ ; Coc.+Tail-  
 639 pinch+hM4Di/VEH,  $n = 8$ ; Coc.+Tail-pinch+hM4Di/CNO,  $n = 6$ ) and representative locomotion  
 640 tracks for 30 min after tail-pinch, cocaine injection, and/or either CNO or aCSF infusion (right  
 641 of E). A retrograde viral vector encoding an inhibitory DREADD (hM4Di) was injected into  
 642 the LHb and CNO was intracranially infused into the LH. Average of 50-kHz USVs for 30 min

643 before and after tail-pinch, cocaine injection, and/or either CNO or aCSF infusion (F;  
644 \*\*\* $p < 0.001$ , Coc. vs. Pre, Coc.+Tail-pinch+hM4Di/VEH, and Coc.+Tail-pinch+hM4Di/CNO;  
645 # $p = 0.011$ , ## $p = 0.008$ , Coc.+Tail-pinch+hM4Di/CNO vs. Pre and Coc.+Tail-  
646 pinch+hM4Di/VEH; Coc.,  $n = 5$ ; Coc.+Tail-pinch+hM4Di/VEH,  $n = 6$ ; Coc.+Tail-  
647 pinch+hM4Di/CNO,  $n = 5$ ). Coc., cocaine injection only in hM4Di-expressed rats; Coc.+Tail-  
648 pinch+hM4Di/VEH, cocaine injection, tail-pinch and aCSF infusion into the LH in hM4Di-  
649 expressed rats; Coc.+Tail-pinch+hM4Di/CNO, cocaine injection, tail-pinch and CNO infusion  
650 into the LH in hM4Di-expressed rats.

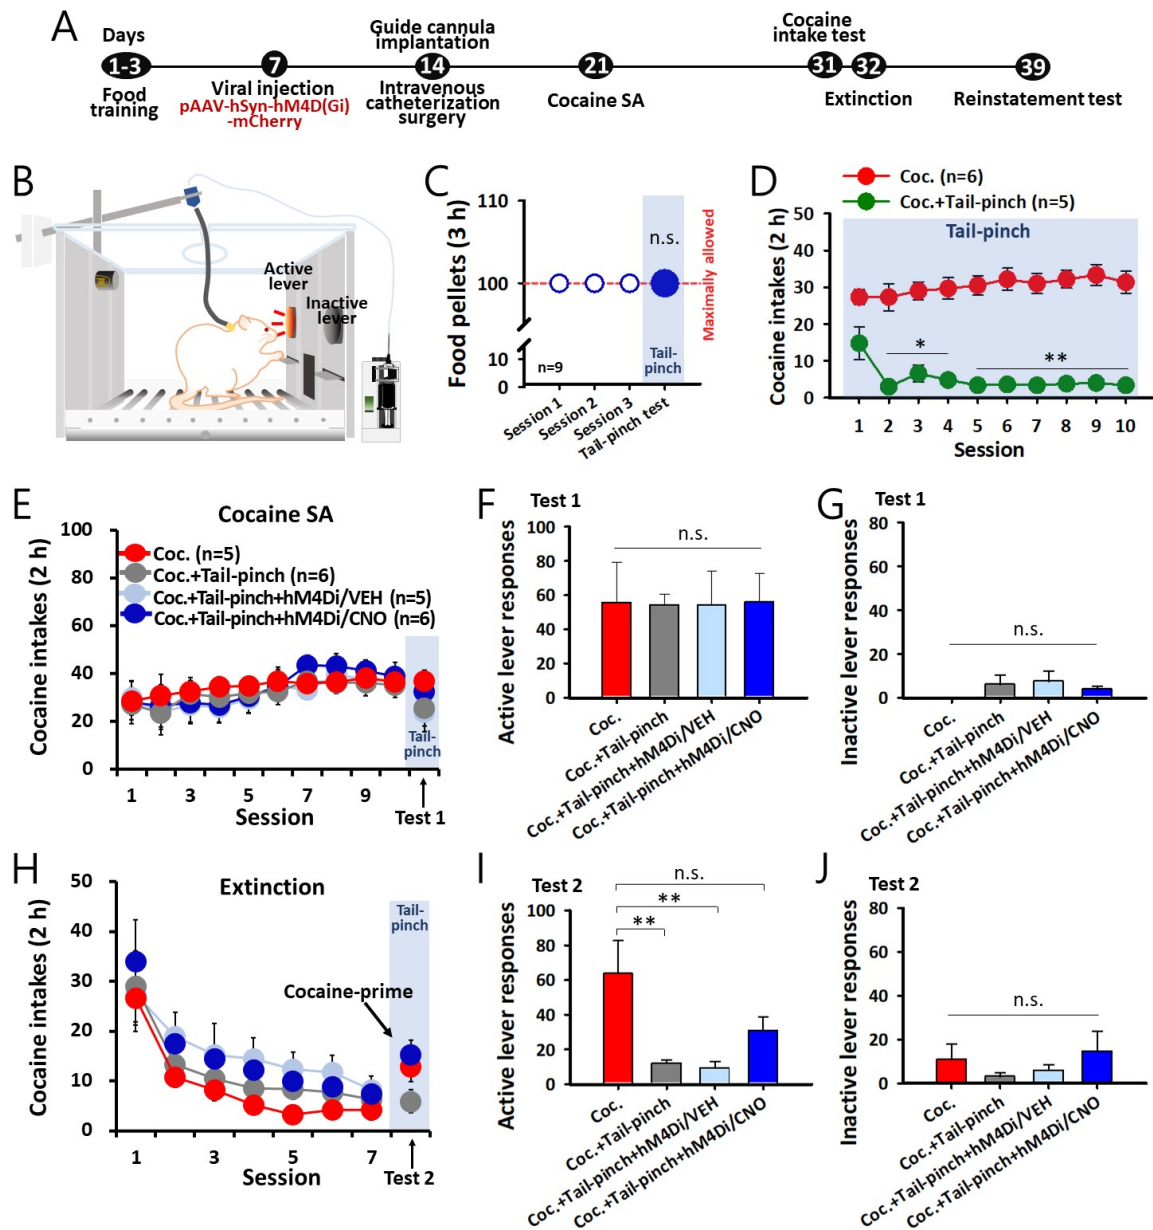

651

652 **Figure 5. Effects of tail-pinch on cocaine-taking/seeking behaviors and its reversal by**  
 653 **chemogenetic silencing of the LH-LHb pathway**

654 **(A, B)** Experimental procedures for the cocaine self-administration. **(C)** Effect of tail-pinch on  
 655 the consumption of food pellets during food training session. The total number of food pellets  
 656 was limited to 100 in each experiment. n=9 rats. p=1.000. **(D)** Effect of tail-pinch on cocaine  
 657 intakes during cocaine self-administration training. Coc. (cocaine self-administration training;  
 658 n=6); Coc.+Tail-pinch (tail-pinch during cocaine self-administration training, n=5). \*p=0.034,  
 659 0.024, and 0.012, \*\*p=0.008, 0.005, 0.007, 0.006, 0.004, and 0.006, Coc. vs. Coc.+Tail-pinch.  
 660 **(E-G)** Effect of tail-pinch on cocaine intakes after acquisition of cocaine self-administration  
 661 over 10 sessions. Time courses of cocaine infusions (E). The numbers of active lever  
 662 responding following tail-pinch (F; p=1.000). The number of inactive lever responding  
 663 following tail-pinch (G; p=0.313). **(H-J)** Inhibition by tail-pinch of cocaine-primed

664 reinstatement of cocaine-seeking behavior and its reversal by chemogenetic silencing of the  
665 LH-LHb pathway. Time courses of cocaine infusions (H). The numbers of active lever  
666 responding following tail-pinch (I; \*\* $p=0.006$  and  $0.004$ , Coc. vs. Coc.+Tail-pinch and  
667 Coc.+Tail-pinch+hM4Di/VEH). The number of inactive lever responding (J;  $p=0.351$ ). Coc.,  
668 cocaine priming injection only ( $n=5$ ); Coc.+Tail-pinch, cocaine priming injection + tail-pinch;  
669 Coc.+Tail-pinch+hM4Di/VEH, cocaine priming injection, tail-pinch and aCSF infusion into  
670 the LH in hM4Di-expressed rats ( $n=5$ ); Coc.+Tail-pinch+hM4Di/CNO, cocaine priming  
671 injection, tail-pinch and CNO infusion into the LH in hM4Di-expressed rats ( $n=6$ ).

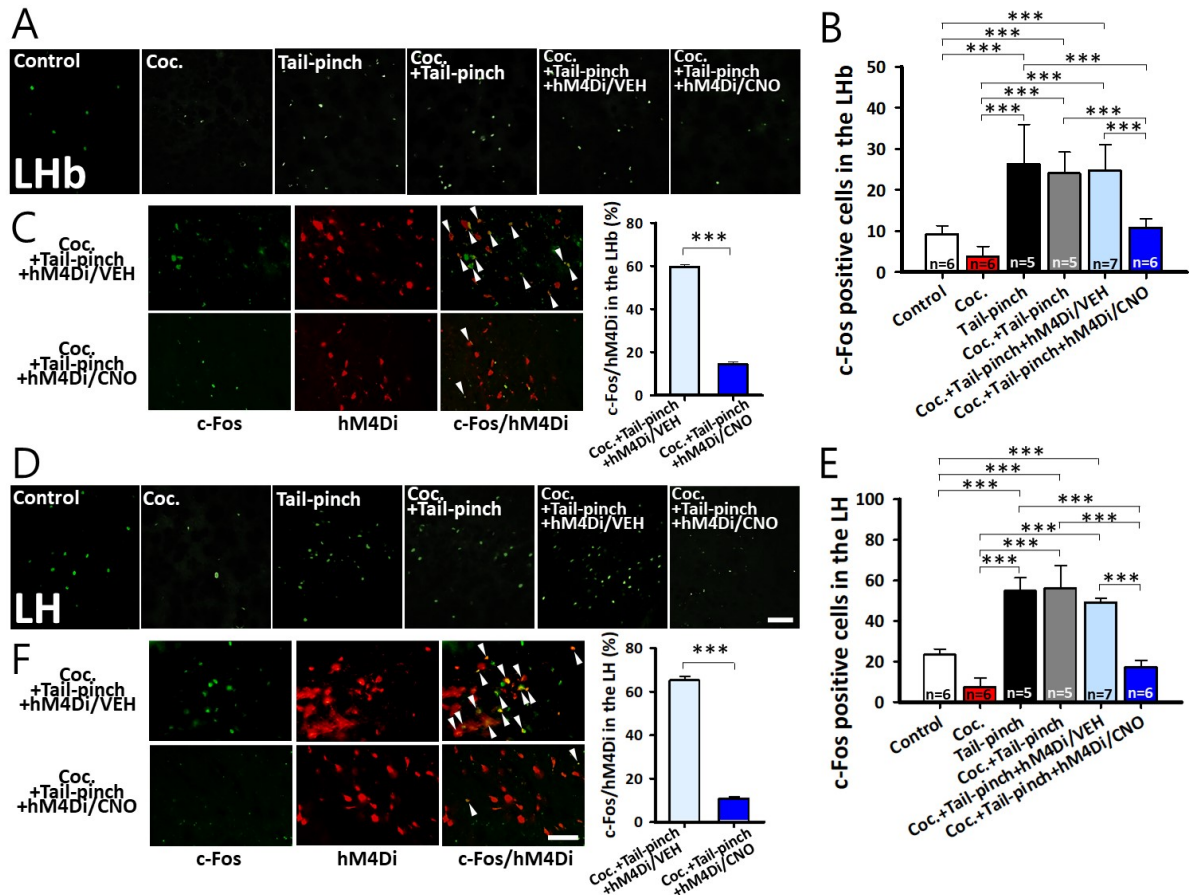

672

673 **Figure 6. Effects of tail-pinch and chemogenetic silencer on c-Fos expression in the LH**  
 674 **and the LHb neurons.**

675 **(A)** Representative images of c-Fos expression in the LHb in Control (n=6), Coc. (n=6), Tail-  
 676 pinch (n=5), Coc.+Tail-pinch (n=5), Coc.+Tail-pinch+hM4Di/VEH (n=7), and Coc.+Tail-  
 677 pinch+hM4Di/CNO (n=6) groups. **(B)** The number of the c-Fos positive neurons in the LHb in  
 678 each group. \*\*\*p<0.001. **(C)** Representative images of c-Fos immunoreactivity, hM4Di viral  
 679 expression, and c-Fos expression in the hM4Di-infected neurons (indicated by arrowheads) in  
 680 the LHb of Coc.+Tail-pinch+hM4Di/VEH and Coc.+Tail-pinch+hM4Di/CNO groups (left)  
 681 and ratios of the c-Fos positive hM4Di-infected neurons to hM4Di-infected neurons in the  
 682 LHb (right; \*\*\*p<0.001, Coc.+Tail-pinch+hM4Di/VEH vs. Coc.+Tail-pinch+hM4Di/CNO).

683 **(D)** Representative images of c-Fos expression in the LH in Control (n=6), Coc. (n=6), Tail-  
 684 pinch (n=5), Coc.+Tail-pinch (n=5), Coc.+Tail-pinch+hM4Di/VEH (n=7), and Coc.+Tail-  
 685 pinch+hM4Di/CNO (n=6) groups. Bar=40  $\mu$ m. **(E)** The number of c-Fos positive neurons in  
 686 the LH in each group. \*\*\*p<0.001. **(F)** Representative images of c-Fos immunoreactivity,  
 687 hM4Di viral expression, and c-Fos expression in the hM4Di-infected neurons (indicated by  
 688 arrowheads) in the LH of the Coc.+Tail-pinch+hM4Di/VEH and Coc.+Tail-  
 689 pinch+hM4Di/CNO groups (left) and ratios of the c-Fos positive hM4Di-infected neurons to  
 690 all the hM4Di-infected neurons in the LH (right; \*\*\*p<0.001, Coc.+Tail-pinch+hM4Di/VEH  
 691 vs. Coc.+Tail-pinch+hM4Di/CNO). Bar=40  $\mu$ m.
